# Supplementary material for: The Potential Health Benefits of the Ketogenic Diet: A Narrative Review
Source: MDPI journal article supplement (doi:10.3390/nu13051654), 2021-05-13
Supplement: s1 [file s1]

**Table S1: Main studies reporting the effects of low-carbohydrate diets, including ketogenic diets, on weight loss.**

| References          | Sample size | Type of diet                | Health Status                                      | Duration         | Weight loss outcomes                                                                                                                                                                                    |
|---------------------|-------------|-----------------------------|----------------------------------------------------|------------------|---------------------------------------------------------------------------------------------------------------------------------------------------------------------------------------------------------|
| Athinarayanan 2019  | N = 262     | KD                          | T2                                                 | 2 year follow-up | -10% Mean Body weight reduction<br>Reductions in abdominal fat                                                                                                                                          |
| Bruci 2020          | N = 92      | Very low-calorie VLCKD      | Obesity and mild kidney failure                    | 3 months         | Average weight loss ~20% initial weight<br>Decreased fat mass (-11.23 kg)<br>Decreased BMI (-5.64 kg/m <sup>2</sup> )                                                                                   |
| Carmen 2020         | N =3        | KD                          | Obesity<br>Comorbid binge eating<br>food addiction | 6-7 months       | Reduced body weight (10-24%)<br>Weight maintenance for 9-17 post treatment with continued adherence<br>Decreased BMI (3.8-6.8 kg/m <sup>2</sup> )                                                       |
| Castro 2018         | N =20       | Very low-calorie VLCKD      | Obese                                              | 4 month          | Decreased BMI (7.7)<br>Decreased fat mass (18 kg)<br>Decreased visceral fat (1.2 kg)                                                                                                                    |
| Choi 2018           | N = 46      | KD 4:1 and KD 1.7:1         | Obese Adults                                       | 2 weeks          | Decreased waist circumference<br>Decreased BMI<br>Decreased Body fat mass<br>Decreased Body weight<br>Skeletal Mass Unchanged only in 1.7:1 KD                                                          |
| D'Abbondanza 2020   | N = 70      | Very low-carbohydrate VLCKD | Severe Obesity                                     | 25 days          | Reduced waist circumference (Males -8.5 cm vs Females 6.0 cm)<br>Decreased BW ( Males -13 kg vs Females -10kg)<br>Decreased BMI (4 kg/m <sup>2</sup> )<br>Decreased Fat mass (Males -4% vs Females -3%) |
| Dashti 2007         | N=64        | KD                          | T2<br>Obese                                        | 56 weeks         | Significant loss in BW                                                                                                                                                                                  |
| Dashti 2006         | N =66       | KD                          | Obese High Cholesterol                             | 56 weeks         | Decreased BW (-25.9 %)<br>Decreased BMI                                                                                                                                                                 |
| Ebbeling 2018       | N = 164     | Low carb diet (20% carb)    | Adults BMI >25                                     | 20 weeks         | Total energy expenditure increased 52kcal/d for every 10% decrease in carbohydrate contribution to total energy intake.                                                                                 |
| Gibas 2017          | N = 30      | Benign dietary ketosis      | Metabolic syndrome                                 | 10 weeks         | Decreased BW<br>Decreased BMI<br>Increased RMR                                                                                                                                                          |
| Gomez-Arbelaiz 2018 | N = 20      | Very low calorie KD         | Obese                                              | 4 months         | Fat Mass Decreased -16.5 kg<br>Minor Reduction in Fat Free Mass -3.8kg<br>RMR unchanged                                                                                                                 |

|                |         |                                     |                        |                   |                                                                                                                                                                                                     |
|----------------|---------|-------------------------------------|------------------------|-------------------|-----------------------------------------------------------------------------------------------------------------------------------------------------------------------------------------------------|
| Goss 2020      | N = 34  | Very low carb diet VLCD             | Obese                  | 8 weeks           | 9.7% Total Fat loss<br>-22.8% VAT loss<br>Decreased BW                                                                                                                                              |
| Guldbrand 2012 | N = 61  | Low carb Diet (20% carb)            | T2                     | 24 months         | Weight loss (-4.31 kg)                                                                                                                                                                              |
| Hall 2016      | N=17    | KD                                  | Overweight or obese    | 8 weeks           | Increased Energy expenditure<br>Weight loss in 4 week KD (-2.2 kg)<br>Body fat loss (0.5kg)                                                                                                         |
| Hallberg 2018  | N = 349 | KD                                  | T2                     | 1 year            | Decreased BW (Average -13.8 kg)                                                                                                                                                                     |
| Hussain 2012   | N = 363 | Low carb KD                         | Obese T2               | 24 week           | ~12% Weight loss<br>Decreased waist circumference (-6-7%)                                                                                                                                           |
| Lennerz 2018   | N = 316 | Very low carbohydrate diet (VLCD)   | T1                     | At least 3 months | None                                                                                                                                                                                                |
| Kong 2020      | N=20    | Shortterm KD                        | Obese Chinese females  | 8 weeks           | Reduced body weight (-2.9kg)<br>Reduced BMI (-1.1kg)<br>Reduced waist circumference (-4.0cm)<br>Reduced hip circumference (-2.5cm)<br>Reduced body fat (-2.0%)<br>Reduced fasting leptin levels     |
| Martin 2011    | N = 270 | Low carb diet LCD (<20g/d)          | Obese                  | 2 years           | Decreased cravings for carbs<br>Decreased BW (-7.8%)<br>Decreased hunger                                                                                                                            |
| McClernan 2007 | N =119  | Low carb KD                         | Overweight             | 6 months          | Decreased BW (-12.9 kg)<br>Decreased hunger                                                                                                                                                         |
| Michalzyk 2020 | N = 91  | Low calorie KD                      | Obese overweight       | 12 week           | Decreased BW (-13.72 kg)<br>Decreased BMI (8.05 kg/m <sup>2</sup> )<br>Decreased Waist circumference (-13.7 cm)<br>Decreased Hip circumference (-11.61 cm)<br>Decreased thigh circumference (-7.66) |
| Mohorko 2018   | N = 35  | KD + short term calorie restriction | Sedentary obese adults | 12 weeks          | Male weight loss (-18kg)<br>Female weight loss (-11kg)<br>Significant loss in fat mass (Male:-6kg and Females -3kg)<br>Reduced leptin levels<br>Slight increase energy expenditure                  |
| Monda 2020     | N = 20  | Very low calorie KD                 | Obese                  | 8 weeks           | Decreased BW (-12.6 kg)<br>Decreased BMI (-4.43 kg/m <sup>2</sup> )<br>Decreased VAT (-613 g)                                                                                                       |

|             |         |                                                                      |                                                             |           |                                                                                                                         |
|-------------|---------|----------------------------------------------------------------------|-------------------------------------------------------------|-----------|-------------------------------------------------------------------------------------------------------------------------|
|             |         |                                                                      |                                                             |           | Decreased FM (-11,831 g)<br>Fat free mass and bone mineral density unchanged                                            |
| Moreno 2016 | N = 45  | Very low calorie<br>KD followed by<br>transition to<br>balanced diet | Obese                                                       | 24 months | Decreased BW (-12.5 kg)<br>Decreased BFM (-8.8 kg)<br>Decreased WC (-11.6 cm)<br>Decreased VAT                          |
| Samaha 2003 | N = 132 | Low carb diet<br>(<30g/day)                                          | Severely obese                                              | 6 months  | Weight loss -5.8 kg                                                                                                     |
| Shai 2008   | N = 322 | Low<br>carbohydrate,<br>non-restricted<br>calorie (20-120<br>g/day)  | Moderately<br>obese                                         | 2 years   | -4.7 kg overall weight change<br>Mean weight change -5.5kg<br>Mean BMI -1.5<br>Significant decrease waist circumference |
| Shih 2019   | N = 609 | Healthy low carb<br>HLC                                              | Generally<br>healthy with<br>BMI 28-40<br>kg/m <sup>2</sup> | 12 months | Average decrease body weight (-6.3 kg)<br>As percentage of SFA increased, body weight lost increased                    |
| Walton 2019 | N = 11  | Low<br>carbohydrate KD                                               | T2                                                          | 90 days   | Average weight loss -9kg                                                                                                |

**Table S2: Main studies reporting the effects of low-carbohydrate diets, including ketogenic diets, on diabetes health markers.**

| References         | Sample size     | Type of diet                            | Health Status             | Duration          | Diabetic Outcomes                                                                                                         |
|--------------------|-----------------|-----------------------------------------|---------------------------|-------------------|---------------------------------------------------------------------------------------------------------------------------|
| Ahmed 2020         | N =49           | LCHF                                    | T2                        | ≥ 3 months        | -1.29% in A1C<br>-43.5 mg/ml reduction in fasting BG<br>100% on insulin discontinued or reduced insulin dose.             |
| Athinarayanan 2019 | N = 262         | KD                                      | T2                        | 2 year followup   | Glycemic medication declined from 55.7 to 36.8%<br>-62% in insulin<br>53.5% diabetes reversal<br>17.6% diabetes remission |
| Bruci 2020         | N =92           | Very low-calorie ketogenic diet (VLCKD) | Obese                     | 3 months          | Significant reduction in fasting glucose and HbA1c                                                                        |
| D'Abbondanza 2020  | N = 70          | Very low-carbohydrate VLCKD             | Severe Obesity            | 25 days           | Reduced HbA1c (Males -0.6% vs -1.4%)<br>Reduced HOMA-IR (Males -6.8 vs Females -2.6)                                      |
| Dashti 2006        | N=66            | KD                                      | Obese<br>High cholesterol | 56 weeks          | Decreased blood glucose (-31%)                                                                                            |
| Dashti 2007        | N=64            | KD                                      | T2<br>Obese               | 56 weeks          | Significant decrease in blood glucose of diabetic patients (10.5 mmol/l to 5 mmol/l)                                      |
| Gibas 2017         | N = 30          | Benign dietary ketosis                  | Metabolic syndrome        | 10 weeks          | Decreased HbA1c                                                                                                           |
| Goss 2020          | N=34            | Very low carbohydrate diet (VLCD)       | Obese                     | 8 weeks           | Significant decrease in fasting insulin<br>Decreased HOMA-IR<br>Increased insulin sensitivity                             |
| Hallberg 2018      | N = 349         | KD                                      | T2                        | 1 year            | -1.3 HbA1c<br>94% insulin therapy reduced or eliminated                                                                   |
| Hussain 2012       | N = 363         | Low carb KD                             | 102 patients with T2      | 24 week           | HbA1c decrease (7.8 to ~6.3)<br>Decrease BG (9.1 mmol/l to ~6.4)                                                          |
| Krebs 2016         | N = 10          | Low carb (<75g/day)                     | T1                        | 12 week           | HbA1c decrease (63 to 55 mmol/mol)<br>Reduced insulin (64.4 to 44.2 units)                                                |
| Lennerz 2018       | N = 316         | Very low carbohydrate diet (VLCD)       | T1                        | At least 3 months | Mean HbA1c is 5.67%<br>Mean daily insulin dose 0.40 U/kg per day                                                          |
| Lichtash 2020      | N =1 case study | KD and intermittent fasting             | T2                        | 14 months         | HbA1c reached 5.8%                                                                                                        |

|                 |         |                                                         |                                   |                        |                                                                                                                                                |
|-----------------|---------|---------------------------------------------------------|-----------------------------------|------------------------|------------------------------------------------------------------------------------------------------------------------------------------------|
| Michalczyk 2020 | N = 91  | Low calorie KD                                          | Hyperinsulemic and hyperglycaemic | 12 week                | HbA1c decreased (5.87 mg/L to 5.38)<br>Glucose decreased (5.94 mmol/L to 4.74)<br>Insulin decreased (14.12 ug/DI to 6.61)<br>HOMA-IR decreased |
| Mohorko 2018    | N = 35  | KD + short term calorie restriction                     | Sedentary obese adults            | 12 weeks               | Significant decrease in serum glucose followed by return to baseline<br>Insulin levels decreased continually                                   |
| Monda 2020      | N = 20  | Very low calorie KD                                     | Obese                             | 8 weeks                | Decreased glycemia<br>Decreased HbA1c<br>Decreased insulinemia                                                                                 |
| Neilsen 2012    | N =48   | Low carb (<75g/day)                                     | T1                                | 4 year follow-up       | Adherent dieters achieved HbA1c decrease (7.8 to 6.0%)                                                                                         |
| Saslow 2017     | N =34   | Very low carb KD                                        | T2 or prediabetes                 | 12 months              | HbA1c decrease (6.6 to 6.1%)<br>Reduction in diabetes medications                                                                              |
| Saslow 2017     | N =25   | Very low carb KD                                        | T2                                | 32 weeks               | More than half patients lowered HbA1c to <6.5%                                                                                                 |
| Shai 2008       | N = 322 | Low carbohydrate, non-restricted calorie (20-120 g/day) | Moderately obese                  | 2 years                | Significant decrease in HbA1c (-0.9)                                                                                                           |
| Tay 2015        | N = 115 | Very low carbohydrate, high unsaturated fat             | T2                                | 54 weeks               | Reduced HbA1c (-1.0%)<br>Reduced fasting glucose (0.7mmol/L)<br>Greater reduction in in diabetes medications                                   |
| Walton 2019     | N = 11  | Low carbohydrate KD                                     | T2                                | 90 days                | HbA1c decreased to 5.6%                                                                                                                        |
| Webster 2019    | N = 24  | LCHF                                                    | T2                                | 15 months at follow-up | HbA1c decreased from 7.5 to 5.9%                                                                                                               |
| Westman 2008    | N = 84  | LCKD                                                    | T2                                | 24 weeks               | HbA1c decreased 1.5%<br>95.2% reduced or eliminated diabetes medications                                                                       |
| Wong 2020       | N = 14  | KD                                                      | T2 or T1                          | ≥ 3 months             | Improved blood glucose levels, reduced or stopped diabetes medications                                                                         |

**Table S3: Main studies reporting the effects of low-carbohydrate diets, including ketogenic diets, on lipidology health markers.**

| References         | Sample size | Type of diet                      | Health Status                   | Duration        | Lipid Outcomes                                                                                                                                                                                                                           |
|--------------------|-------------|-----------------------------------|---------------------------------|-----------------|------------------------------------------------------------------------------------------------------------------------------------------------------------------------------------------------------------------------------------------|
| Athinarayanan 2019 | N = 262     | KD                                | T2                              | 2 year followup | Decreases in systolic and diastolic blood pressures<br>Decreased triglycerides<br>Increased HDL<br>Increased LDL (decrease sdLDL and large VLDL-P, increase in LDL particle size partitioning with no change in ApoB)<br>No change in TC |
| Bruci 2020         | N = 92      | Very low-calorie VLCKD            | Obesity and mild kidney failure | 3 months        | Decreases in systolic and diastolic blood pressures<br>33.3% on antihypertensive medications reduced or eliminated<br>Reduced TC and TG<br>No change in HDL or LDL                                                                       |
| Choi 2018          | N = 46      | KD 4:1 and KD 1.7:1               | Obese Adults                    | 2 weeks         | Total Cholesterol Unchanged (4:1) or Decreased (1.7:1)<br>TG unchanged<br>LDL Unchanged (4:1 KD)<br>LDL Decreased (1.7:1)<br>HDL unchanged                                                                                               |
| Dashti 2007        | N=64        | KD                                | T2<br>Obese                     | 56 weeks        | Decreased in LDL, Total cholesterol, and TG<br>Increase in HDL/LDL ratio<br>Increase in HDL                                                                                                                                              |
| Dashti 2006        | N=66        | KD                                | Obese<br>High cholesterol       | 56 weeks        | Decreased in LDL (-28.2%),<br>Decreased Total cholesterol (-19.3%)<br>Decreased TG (-59%)<br>Increase in HDL (+52.3%)                                                                                                                    |
| Ebbeling 2018      | N = 164     | Low carb diet (20% carb)          | Adults BMI >25                  | 20 weeks        | Decreased TG<br>Increased HDL                                                                                                                                                                                                            |
| Gibas 2017         | N = 30      | Benign dietary ketosis            | Metabolic syndrome              | 10 weeks        | Decrease in TG                                                                                                                                                                                                                           |
| Goss 2020          | N=34        | Very low carbohydrate diet (VLCD) | Obese                           | 8 weeks         | Increased HDL<br>Decreased TG<br>TC and LDL unchanged                                                                                                                                                                                    |

|                |         |                                     |                            |                   |                                                                                                                                                                                                                                                                                |
|----------------|---------|-------------------------------------|----------------------------|-------------------|--------------------------------------------------------------------------------------------------------------------------------------------------------------------------------------------------------------------------------------------------------------------------------|
| Guldbrand 2012 | N = 61  | Low carb Diet (20% carb)            | T2                         | 24 months         | Increased HDL<br>LDL unchanged                                                                                                                                                                                                                                                 |
| Hall 2016      | N=17    | KD                                  | Overweight or obese        | 8 weeks           | Decrease in TG (Ave 85.4 mg/dL)                                                                                                                                                                                                                                                |
| Hallberg 2018  | N = 349 | KD                                  | T2                         | 1 year            | Decreases in systolic and diastolic blood pressures<br>Decreased triglycerides (-24%)<br>Increased HDL (+18%)<br>Increased LDL (+10%)<br>No change in ApoB)                                                                                                                    |
| Hussain 2012   | N = 363 | Low carb KD                         | 102 patients with T2       | 24 week           | Decreased TG<br>Decreased Total Cholesterol<br>Increased HDL<br>Decreased LDL                                                                                                                                                                                                  |
| Lennerz 2018   | N = 316 | Very low carbohydrate diet (VLCD)   | T1                         | At least 3 months | Low TG<br>Elevated HDLc<br>High Total cholesterol<br>High LDLc                                                                                                                                                                                                                 |
| Michalzyk 2020 | N = 91  | Low calorie KD                      | Obese overweight           | 12 week           | Decreased TG (-84.32 mg/dL)<br>Increased HDL (16.28)                                                                                                                                                                                                                           |
| Mohorko 2018   | N = 35  | KD + short term calorie restriction | Sedentary obese adults     | 12 weeks          | Temporary increase in LDL (2 weeks) then returned to baseline                                                                                                                                                                                                                  |
| Monda 2020     | N = 20  | Very low calorie KD                 | Obese                      | 8 weeks           | Decreased TC<br>Decreased LDL<br>Decreased TG<br>HDL unchanged                                                                                                                                                                                                                 |
| Norwitz 2020   | N =1    | HFLC KD                             | Inflammatory Bowel disease | 7 months          | Increased TC (160 to 450 mg/dL)<br>Increased LDL-C (95 to 321 mg/dL)<br>Increased LDL-P (1,143 to 2,259; Small & Medium decreased and Large (ApoB) Increased)<br>Decreased LDL<br>Increased HDL-C (48 to 109 mg/dL)<br>Increased HDL-P (5,699 nmol/L to 12,080)<br>CAC score 0 |
| Samaha 2003    | N = 132 | Low carb diet (<30g/day)            | Severely obese             | 6 months          | Decrease TG (-20%)<br>TC, HDL, and LDL unchanged                                                                                                                                                                                                                               |

|             |         |                                                         |                                        |           |                                                                                                                                                                                         |
|-------------|---------|---------------------------------------------------------|----------------------------------------|-----------|-----------------------------------------------------------------------------------------------------------------------------------------------------------------------------------------|
| Shai 2008   | N = 322 | Low carbohydrate, non-restricted calorie (20-120 g/day) | Moderately obese                       | 2 years   | Significant decrease in blood pressure (Systolic -3.9 mmHg and -08 in diastolic)<br>Decrease in TG (23.7 mg/dL)<br>LDL unchanged<br>Increased HDL (8.4 mg/dL)<br>20% decrease in TC/HDL |
| Shih 2019   | N =609  | Healthy low carb HLC                                    | Generally healthy with BMI 28-40 kg/m2 | 12 months | Higher LDL (119.8)<br>Higher HDL (53.1)<br>Lower TG (100.6)<br>Every 1% increase in SFA intake resulted in decrease in TG without changes in LDL or HDL                                 |
| Walton 2019 | N = 11  | Low carbohydrate KD                                     | T2                                     | 90 days   | Lower systolic and diastolic blood pressure (-10.7 and -7.3 mmHg)<br>Increased HDL (+9.2 mg/dl)<br>Decreased TG (-84.9 mg/dl)<br>LDL unchanged<br>Decreased TG:HDL ratio (-2.8)         |

**Table S4: Main studies reporting the effects of low-carbohydrate diets, including ketogenic diets, on cancer.**

| References       | Study Type        | Type of diet                                      | Cancer Type             | Outcomes                                                                                                           |
|------------------|-------------------|---------------------------------------------------|-------------------------|--------------------------------------------------------------------------------------------------------------------|
| Abdelwahab 2012  | Mice              | KetoCal KD                                        | Brain                   | Decreased Tumor Growth<br>Increased Survival Time                                                                  |
| Allen 2013       | Mice              | KD                                                | Lung                    | Decreased Tumor Growth                                                                                             |
| Caso 2013        | Mice              | KD (0% CHO, 10% CHO, or 20% CHO)                  | Prostate                | Slowest Tumor Growth in 20% CHO group<br>Mean Survival Time Unchanged                                              |
| Cohen 2018       | Human Women       | KD                                                | Ovaria and endometrial  | Favorable effects on physical function, perceived energy, and diminished food cravings for starchy and fast foods. |
| Cohen 2020       | Human             | KD                                                | Ovarian and endometrial | 57-80% diet compliance<br>No negative impact on lipid profiles                                                     |
| Elsakka 2018     | Case study of man | Calorie-restricted KD & hyperbaric oxygen therapy | Glioblastoma multiforme | Excellent health with no neurological issues after 2 years of treatment.                                           |
| Hagihara 2020    | Human             | KD                                                | Advanced cancers        | Improved life expectancy                                                                                           |
| Khodabakshi 2020 | Human             | KD                                                | Breast                  | Positive outcomes: Lowered caloric intake, Significantly reduced lactate and ALP                                   |



|                    |                                    |                                  |                                                      |                                                                                                                                                                                                                      |
|--------------------|------------------------------------|----------------------------------|------------------------------------------------------|----------------------------------------------------------------------------------------------------------------------------------------------------------------------------------------------------------------------|
| Kim 2012           | Mice                               | KD (0% CHO)                      | Prostate                                             | Lower Tumor Volumes                                                                                                                                                                                                  |
| Klement 2017       | Meta-analysis of 29 animal studies | KD                               | Varying cancer types                                 | 72% Had Decreased Tumor Growth                                                                                                                                                                                       |
| Klement 2017       | Meta-analysis of 24 human studies  | KD                               | Varying cancer types                                 | 42% had Decreased Tumor Growth                                                                                                                                                                                       |
| Klement 2019       | Human                              | KD                               | Varying cancer types                                 | Improved body composition while receiving radiotherapy                                                                                                                                                               |
| Martin-McGill 2020 | Human                              | Modified KD                      | Glioblastoma                                         | Global Health Status increased                                                                                                                                                                                       |
| Masko 2010         | Mice                               | KD (0% CHO, 10% CHO, or 20% CHO) | Prostate                                             | No difference in tumor growth<br>No effect on survival time                                                                                                                                                          |
| Morsher 2015       | Mice                               | Calorie restricted KD            | Neuroblastoma                                        | Decreased Tumor Growth<br>Increased Survival Time                                                                                                                                                                    |
| Oliveira 2018      | Meta-analysis of 14 human studies  | KD                               | Varying cancer types                                 | Some positive outcomes, some neutral outcomes, and some did worse.                                                                                                                                                   |
| Otto 2008          | Mice                               | KD                               | Gastric                                              | Decreased Tumor Growth<br>Increased Survival Time                                                                                                                                                                    |
| Panhans 2020       | Human                              | KD                               | CNS malignancies                                     | Increased survival time for those with highest diet compliance and high ketone levels. Increased energy levels, increased physical activity, increased cognitive function, decreased appetite, and reduced seizures. |
| Poff 2013          | Mice                               | KD                               | Systematic Metastatic                                | Lowered Blood Glucose<br>Decreased Tumor Growth<br>Increased Survival Time by 56.7%                                                                                                                                  |
| Van der Louw 2019  | Human                              | KD                               | Recurrent diffuse intrinsic pontine glioma (DIPG)    | Safe and feasible, but effect on survival unclear                                                                                                                                                                    |
| Zhou 2007          | Mice Human                         | KetoCal KD                       | Malignant Mouse Astrocytoma & Human Malignant Glioma | Decreased Tumor Growth by 65%<br>Reduced angiogenesis                                                                                                                                                                |
